# Supplementary material for: Longitudinal transcriptomic characterization of the immune response to acute hepatitis C virus infection in patients with spontaneous viral clearance
Source: PubMed Central journal article supplement (PMC6160227; doi:10.1371/journal.ppat.1007290), 2018-09-17

A

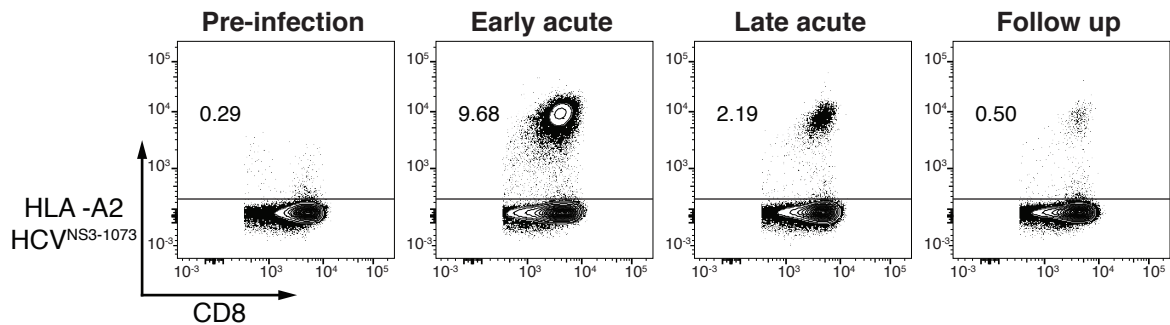

B

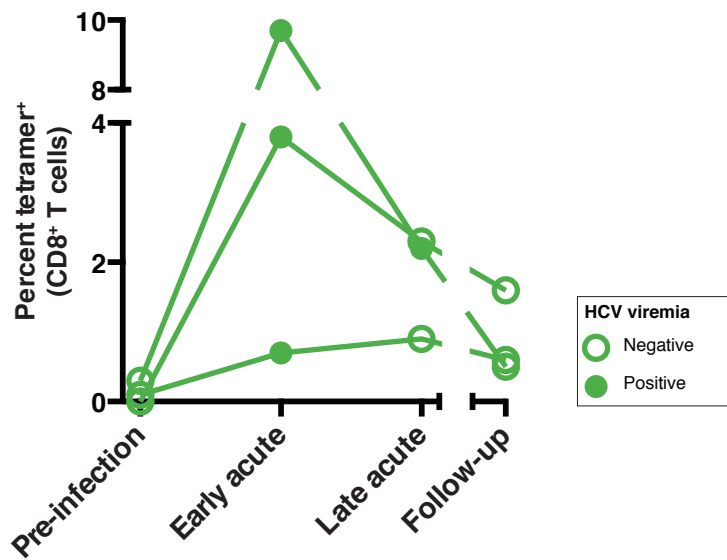

Supplement: ppat.1007290.s002.pdf [file ppat.1007290.s002.pdf]
